# Supplementary material
Source: PubMed Central journal article supplement (PMC2427057)
Supplement: supp_177_12_1364__1.pdf [file supp_177_12_1364__1.pdf]

# **Hyponatremia predicts right heart failure and poor survival in pulmonary arterial hypertension**

**Paul R. Forfia M.D., Stephen C. Mathai M.D. MHS, Micah R. Fisher M.D., Traci Houston-  
Harris R.N., Anna R. Hemnes M.D., Hunter C. Champion M.D. Ph.D., Reda E. Girgis  
M.D., and Paul M. Hassoun M.D.**

**Online supplement**

## **Hemodynamics and echocardiography**

Mean (end-expiratory) right atrial (RAP), pulmonary capillary wedge (PCWP) and pulmonary arterial pressures were recorded, and thermodilution cardiac output was obtained and reported as the average of at least three values with < 20% variation. Mixed venous oxygen saturation (SVO<sub>2</sub>) was determined by measuring the oxygen saturation of blood drawn from the pulmonary artery. Heart rate and noninvasive blood pressure were recorded during the procedure. Stroke volume (SV; CO/HR), cardiac index (CI; CO/BSA), stroke volume index (SVI; CI/HR), pulmonary vascular resistance (PVR; (mPAP – PCWP)/CO), and RV stroke work index (RVSWI; mean pulmonary artery pressure-right atrial pressure x SVI) were calculated. The ratio of stroke volume to pulmonary artery pulse pressure reflects pulmonary artery compliance (1).

## **Echocardiography**

Right ventricular systolic function was quantified by measuring the tricuspid annular plane systolic excursion (TAPSE), as well as RV fractional area change using methods described previously. Right heart size was expressed as right atrial (systolic) and RV (diastolic) dimensions indexed to patient height. The degree of tricuspid regurgitation was assessed semiquantitatively, graded 0-4. Right to left heart disproportion was reported as ratios of right to left atrial and ventricular dimensions. These methods have been described previously (2). Doppler assessment of RV systolic pressure was obtained in the standard manner.

### **Online Supplement References**

- E1. K. Dyer, C. Lanning, B. Das, P. F. Lee, D. D. Ivy, L. Valdes-Cruz, and R. Shandas. Noninvasive Doppler tissue measurement of pulmonary artery compliance in children with pulmonary hypertension. *J.Am.Soc.Echocardiogr.* 19 (4):403-412, 2006.
- E2. P. R. Forfia, M. R. Fisher, S. C. Mathai, T. Houston-Harris, A. R. Hemnes, B. A. Borlaug, E. Chamera, M. C. Corretti, H. C. Champion, T. P. Abraham, R. E. Girgis, and P. M. Hassoun. Tricuspid annular displacement predicts survival in pulmonary hypertension. *Am.J.Respir.Crit Care Med.* 174 (9):1034-1041, 2006.
